# Supplementary material for: LTR-mediated retroposition as a mechanism of RNA-based duplication in metazoans
Source: HighWire-hosted journal article supplement (doi:10.1101/gr.204925.116), 2016-10-20
Supplement: Supplemental_Tables.xlsx [file Supplemental_Tables.xlsx]

## Sheet: S1
Supplemental Table 1. Summary of the public sequencing data available for the 40 D. melanogaster lines in both the DGRP and DPGP1 datasets.
The “sequencing depth” is calculated as the “Bases” divided by the reference genome size of 168 MB.
Line	Experiment accession	Run	Bases	Read length	Library layout	Insert size	Platform	Project name	Sequencing depth
RAL_208	SRX005977	SRR018056	500044320	45	PAIRED	200	ILLUMINA	DGRP	59.7
	SRX005977	SRR018057	1938008850	75	PAIRED	200	ILLUMINA	DGRP
	SRX005977	SRR018060	2027564700	75	PAIRED	200	ILLUMINA	DGRP
	SRX005977	SRR018062	556381568	64	PAIRED	200	ILLUMINA	DGRP
	SRX015853	SRR034239	768240270	540	SINGLE	0	LS454	DGRP
	SRX015853	SRR034240	600564251	546	SINGLE	0	LS454	DGRP
	SRX015853	SRR034241	726600836	576	SINGLE	0	LS454	DGRP
	SRX015853	SRR034242	603710072	546	SINGLE	0	LS454	DGRP
	SRX015853	SRR034243	699675503	540	SINGLE	0	LS454	DGRP
	SRX022264	SRR058167	413136720	36	SINGLE	0	ILLUMINA	DPGP
	SRX022264	SRR058168	377187372	36	SINGLE	0	ILLUMINA	DPGP
	SRX022264	SRR058169	199598940	36	SINGLE	0	ILLUMINA	DPGP
	SRX022264	SRR058170	328048956	36	SINGLE	0	ILLUMINA	DPGP
	SRX022264	SRR058171	336562776	36	SINGLE	0	ILLUMINA	DPGP
RAL_301	SRX005978	SRR018070	589471560	45	PAIRED	200	ILLUMINA	DGRP	135.8
	SRX005978	SRR018072	1998049650	75	PAIRED	200	ILLUMINA	DGRP
	SRX005978	SRR018074	677651968	64	PAIRED	200	ILLUMINA	DGRP
	SRX005978	SRR018075	1987620300	75	PAIRED	200	ILLUMINA	DGRP
	SRX155995	SRR516005	8783844750	75	PAIRED	300	ILLUMINA	DGRP
	SRX157787	SRR518718	707842016	554	SINGLE	0	LS454	DGRP
	SRX157787	SRR518719	776783134	557	SINGLE	0	LS454	DGRP
	SRX157787	SRR518720	709806011	535	SINGLE	0	LS454	DGRP
	SRX157787	SRR518721	633543250	579	SINGLE	0	LS454	DGRP
	SRX157787	SRR518722	776451288	554	SINGLE	0	LS454	DGRP
	SRX000530	SRR001933	2219400144	36	SINGLE	0	ILLUMINA	DPGP
	SRX000530	SRR001934	2902753944	36	SINGLE	0	ILLUMINA	DPGP
	SRX000530	SRR058173	144599156	26	SINGLE	0	ILLUMINA	DPGP
RAL_303	SRX005985	SRR018084	266740608	64	PAIRED	200	ILLUMINA	DGRP	209
	SRX005986	SRR018086	626130810	45	PAIRED	200	ILLUMINA	DGRP
	SRX005986	SRR018088	255209940	45	PAIRED	200	ILLUMINA	DGRP
	SRX005986	SRR018090	765555840	45	PAIRED	200	ILLUMINA	DGRP
	SRX005986	SRR018092	906900570	45	PAIRED	200	ILLUMINA	DGRP
	SRX005986	SRR018094	1025349120	45	PAIRED	200	ILLUMINA	DGRP
	SRX155977	SRR515987	8431935250	125	PAIRED	300	ILLUMINA	DGRP
	SRX155978	SRR515988	17208397000	100	PAIRED	300	ILLUMINA	DGRP
	SRX157788	SRR518725	669656715	507	SINGLE	0	LS454	DGRP
	SRX157788	SRR518727	269457784	519	SINGLE	0	LS454	DGRP
	SRX157788	SRR518728	605550725	530	SINGLE	0	LS454	DGRP
	SRX157788	SRR518729	354815642	515	SINGLE	0	LS454	DGRP
	SRX157789	SRR518726	580778678	506	SINGLE	0	LS454	DGRP
	SRX157789	SRR518730	227181993	512	SINGLE	0	LS454	DGRP
	SRX157789	SRR518731	272344599	516	SINGLE	0	LS454	DGRP
	SRX000529	SRR001931	1598828940	36	SINGLE	0	ILLUMINA	DPGP
	SRX000529	SRR001932	840516696	36	SINGLE	0	ILLUMINA	DPGP
	SRX000529	SRR058175	138549164	26	SINGLE	0	ILLUMINA	DPGP
	SRX000529	SRR058179	229228380	36	SINGLE	0	ILLUMINA	DPGP
RAL_304	SRX005987	SRR018096	452560640	64	PAIRED	200	ILLUMINA	DGRP	193.3
	SRX005988	SRR018097	1775974200	75	PAIRED	200	ILLUMINA	DGRP
	SRX005988	SRR018098	621822150	45	PAIRED	200	ILLUMINA	DGRP
	SRX005988	SRR018099	506831490	45	PAIRED	200	ILLUMINA	DGRP
	SRX156008	SRR516017	6042109710	105	PAIRED	300	ILLUMINA	DGRP
	SRX156009	SRR516018	17157361800	100	PAIRED	300	ILLUMINA	DGRP
	SRX015854	SRR034244	669724234	562	SINGLE	0	LS454	DGRP
	SRX015854	SRR034245	691044480	544	SINGLE	0	LS454	DGRP
	SRX015854	SRR034246	625406221	542	SINGLE	0	LS454	DGRP
	SRX015854	SRR034247	752428391	540	SINGLE	0	LS454	DGRP
	SRX015854	SRR034248	327336276	557	SINGLE	0	LS454	DGRP
	SRX000531	SRR001935	445572288	36	SINGLE	0	ILLUMINA	DPGP
	SRX000531	SRR001936	951621768	36	SINGLE	0	ILLUMINA	DPGP
	SRX000531	SRR001937	1591315848	36	SINGLE	0	ILLUMINA	DPGP
RAL_306	SRX006139	SRR018273	544660736	64	PAIRED	200	ILLUMINA	DGRP	122.7
	SRX006140	SRR018274	667268280	45	PAIRED	200	ILLUMINA	DGRP
	SRX006140	SRR018275	654296760	45	PAIRED	200	ILLUMINA	DGRP
	SRX006140	SRR018276	1687836750	75	PAIRED	200	ILLUMINA	DGRP
	SRX156007	SRR516016	8263838500	125	PAIRED	300	ILLUMINA	DGRP
	SRX157797	SRR518741	514149447	544	SINGLE	0	LS454	DGRP
	SRX157797	SRR518745	612341090	529	SINGLE	0	LS454	DGRP
	SRX157797	SRR518746	129385732	522	SINGLE	0	LS454	DGRP
	SRX157798	SRR518740	568186833	531	SINGLE	0	LS454	DGRP
	SRX157798	SRR518742	596323030	530	SINGLE	0	LS454	DGRP
	SRX157798	SRR518743	327890754	566	SINGLE	0	LS454	DGRP
	SRX157798	SRR518744	338258492	519	SINGLE	0	LS454	DGRP
	SRX015855	SRR034249	729228666	525	SINGLE	0	LS454	DGRP
	SRX015855	SRR034250	746940983	534	SINGLE	0	LS454	DGRP
	SRX015855	SRR034251	758047705	525	SINGLE	0	LS454	DGRP
	SRX015855	SRR034252	724613885	540	SINGLE	0	LS454	DGRP
	SRX000532	SRR001938	472866516	36	SINGLE	0	ILLUMINA	DPGP
	SRX000532	SRR001939	917736372	36	SINGLE	0	ILLUMINA	DPGP
	SRX000532	SRR001940	1446563628	36	SINGLE	0	ILLUMINA	DPGP
RAL_307	SRX006186	SRR018342	778691160	45	PAIRED	200	ILLUMINA	DGRP	197.6
	SRX006187	SRR018343	347089104	36	PAIRED	200	ILLUMINA	DGRP
	SRX006188	SRR018344	968723175	75	PAIRED	200	ILLUMINA	DGRP
	SRX156011	SRR516020	8443047000	125	PAIRED	300	ILLUMINA	DGRP
	SRX156012	SRR516021	16921596000	100	PAIRED	300	ILLUMINA	DGRP
	SRX015860	SRR034264	665397663	545	SINGLE	0	LS454	DGRP
	SRX015860	SRR034265	655720535	545	SINGLE	0	LS454	DGRP
	SRX015860	SRR034266	781580279	574	SINGLE	0	LS454	DGRP
	SRX015860	SRR034267	681416211	540	SINGLE	0	LS454	DGRP
	SRX015860	SRR034268	618550881	551	SINGLE	0	LS454	DGRP
	SRX000533	SRR001941	530545752	36	SINGLE	0	ILLUMINA	DPGP
	SRX000533	SRR001942	467042508	36	SINGLE	0	ILLUMINA	DPGP
	SRX000533	SRR001943	538507980	36	SINGLE	0	ILLUMINA	DPGP
	SRX000533	SRR001944	526753008	36	SINGLE	0	ILLUMINA	DPGP
	SRX000533	SRR001945	423127872	36	SINGLE	0	ILLUMINA	DPGP
RAL_313	SRX006275	SRR018517	817426530	45	PAIRED	200	ILLUMINA	DGRP	41.3
	SRX006276	SRR018518	341203536	36	PAIRED	200	ILLUMINA	DGRP
	SRX006277	SRR018519	1051728225	75	SINGLE	0	ILLUMINA	DGRP
	SRX015856	SRR034253	729279804	537	SINGLE	0	LS454	DGRP
	SRX015856	SRR034254	772761995	540	SINGLE	0	LS454	DGRP
	SRX015856	SRR034255	769510090	528	SINGLE	0	LS454	DGRP
	SRX015856	SRR034256	704760656	530	SINGLE	0	LS454	DGRP
	SRX022270	SRR058190	465724728	36	SINGLE	0	ILLUMINA	DPGP
	SRX022270	SRR058191	270733608	36	SINGLE	0	ILLUMINA	DPGP
	SRX022270	SRR058192	629737668	36	SINGLE	0	ILLUMINA	DPGP
	SRX022270	SRR058193	412912692	36	SINGLE	0	ILLUMINA	DPGP
RAL_315	SRX006141	SRR018277	730667070	45	PAIRED	200	ILLUMINA	DGRP	88.9
	SRX006142	SRR018278	1450980630	45	PAIRED	200	ILLUMINA	DGRP
	SRX006143	SRR018279	1530586650	75	PAIRED	200	ILLUMINA	DGRP
	SRX156010	SRR516019	6014199240	105	PAIRED	300	ILLUMINA	DGRP
	SRX015859	SRR034259	734887499	533	SINGLE	0	LS454	DGRP
	SRX015859	SRR034260	370509647	525	SINGLE	0	LS454	DGRP
	SRX015859	SRR034261	609392353	537	SINGLE	0	LS454	DGRP
	SRX015859	SRR034262	643201836	529	SINGLE	0	LS454	DGRP
	SRX015859	SRR034263	649234871	528	SINGLE	0	LS454	DGRP
	SRX000535	SRR001951	1805262804	36	SINGLE	0	ILLUMINA	DPGP
	SRX000535	SRR001952	295780536	36	SINGLE	0	ILLUMINA	DPGP
	SRX000535	SRR058196	169501716	36	SINGLE	0	ILLUMINA	DPGP	162.7
RAL_324	SRX006144	SRR018280	795137940	45	PAIRED	200	ILLUMINA	DGRP
	SRX006145	SRR018281	802373400	45	PAIRED	200	ILLUMINA	DGRP
	SRX006145	SRR018282	1089697500	45	PAIRED	200	ILLUMINA	DGRP
	SRX006145	SRR018283	903338460	45	PAIRED	200	ILLUMINA	DGRP
	SRX155982	SRR515992	17487484400	100	PAIRED	300	ILLUMINA	DGRP
	SRX015974	SRR034413	696994892	504	SINGLE	0	LS454	DGRP
	SRX015974	SRR034414	736074479	517	SINGLE	0	LS454	DGRP
	SRX015974	SRR034415	644065264	499	SINGLE	0	LS454	DGRP
	SRX015974	SRR034416	647731474	507	SINGLE	0	LS454	DGRP
	SRX015974	SRR034417	306692837	544	SINGLE	0	LS454	DGRP
	SRX010933	SRR026828	316069992	36	SINGLE	0	ILLUMINA	DPGP
	SRX010933	SRR026829	322645104	36	SINGLE	0	ILLUMINA	DPGP
	SRX010933	SRR026862	306222552	36	SINGLE	0	ILLUMINA	DPGP
	SRX010933	SRR026863	310872420	36	SINGLE	0	ILLUMINA	DPGP
	SRX010933	SRR026874	218266128	36	SINGLE	0	ILLUMINA	DPGP
	SRX010933	SRR026875	225088884	36	SINGLE	0	ILLUMINA	DPGP
	SRX010933	SRR026932	407502684	36	SINGLE	0	ILLUMINA	DPGP
	SRX010933	SRR026933	405647064	36	SINGLE	0	ILLUMINA	DPGP
	SRX010933	SRR026936	410663232	36	SINGLE	0	ILLUMINA	DPGP
	SRX010933	SRR026937	413197992	36	SINGLE	0	ILLUMINA	DPGP
RAL_335	SRX006278	SRR018521	1930574880	45	PAIRED	200	ILLUMINA	DGRP	49.7
	SRX006279	SRR018522	792753030	45	PAIRED	200	ILLUMINA	DGRP
	SRX006280	SRR018523	423327240	45	SINGLE	0	ILLUMINA	DGRP
	SRX157913	SRR518862	754176793	565	SINGLE	0	LS454	DGRP
	SRX157913	SRR518863	737072835	561	SINGLE	0	LS454	DGRP
	SRX157913	SRR518864	774673149	551	SINGLE	0	LS454	DGRP
	SRX157913	SRR518865	534479694	564	SINGLE	0	LS454	DGRP
	SRX157913	SRR518866	648410515	541	SINGLE	0	LS454	DGRP
	SRX022273	SRR058202	314773128	36	SINGLE	0	ILLUMINA	DPGP
	SRX022273	SRR058203	432693756	36	SINGLE	0	ILLUMINA	DPGP
	SRX022273	SRR058204	389231496	36	SINGLE	0	ILLUMINA	DPGP
	SRX022273	SRR058205	366978600	36	SINGLE	0	ILLUMINA	DPGP
	SRX022273	SRR058206	280324980	36	SINGLE	0	ILLUMINA	DPGP
RAL_357	SRX006146	SRR018284	2222067960	45	PAIRED	200	ILLUMINA	DGRP	58.8
	SRX006146	SRR018285	2192430240	45	PAIRED	200	ILLUMINA	DGRP
	SRX006147	SRR018286	782538210	45	PAIRED	200	ILLUMINA	DGRP
	SRX015861	SRR034269	720085856	549	SINGLE	0	LS454	DGRP
	SRX015861	SRR034270	296774854	548	SINGLE	0	LS454	DGRP
	SRX015861	SRR034271	662311041	544	SINGLE	0	LS454	DGRP
	SRX015861	SRR034272	635504894	565	SINGLE	0	LS454	DGRP
	SRX015861	SRR034273	686932044	542	SINGLE	0	LS454	DGRP
	SRX022274	SRR058207	429981444	36	SINGLE	0	ILLUMINA	DPGP
	SRX022274	SRR058208	398774916	36	SINGLE	0	ILLUMINA	DPGP
	SRX022274	SRR058209	175414068	36	SINGLE	0	ILLUMINA	DPGP
	SRX022274	SRR058210	184987836	36	SINGLE	0	ILLUMINA	DPGP
	SRX022274	SRR058211	403176708	36	SINGLE	0	ILLUMINA	DPGP
	SRX022274	SRR058212	135575676	36	SINGLE	0	ILLUMINA	DPGP
RAL_358	SRX006282	SRR018574	1023061650	75	PAIRED	200	ILLUMINA	DGRP	47.6
	SRX006283	SRR018575	1057427625	75	SINGLE	0	ILLUMINA	DGRP
	SRX006283	SRR029943	405259470	45	SINGLE	0	ILLUMINA	DGRP
	SRX015862	SRR034274	687022010	545	SINGLE	0	LS454	DGRP
	SRX015862	SRR034275	694944189	552	SINGLE	0	LS454	DGRP
	SRX015862	SRR034276	696990563	555	SINGLE	0	LS454	DGRP
	SRX015862	SRR034277	600889835	540	SINGLE	0	LS454	DGRP
	SRX015862	SRR034278	622188983	554	SINGLE	0	LS454	DGRP
	SRX000536	SRR001953	1894393836	36	SINGLE	0	ILLUMINA	DPGP
	SRX000536	SRR001954	230142708	36	SINGLE	0	ILLUMINA	DPGP
	SRX000536	SRR058215	127749492	36	SINGLE	0	ILLUMINA	DPGP
RAL_360	SRX006309	SRR018610	95328756	36	SINGLE	0	ILLUMINA	DGRP	86.2
	SRX006309	SRR018611	95860872	36	SINGLE	0	ILLUMINA	DGRP
	SRX006309	SRR018612	95264532	36	SINGLE	0	ILLUMINA	DGRP
	SRX006309	SRR018613	95715108	36	SINGLE	0	ILLUMINA	DGRP
	SRX006309	SRR018614	93702276	36	SINGLE	0	ILLUMINA	DGRP
	SRX006309	SRR018615	80088372	36	SINGLE	0	ILLUMINA	DGRP
	SRX006309	SRR018616	87454260	36	SINGLE	0	ILLUMINA	DGRP
	SRX006309	SRR018617	82167876	36	SINGLE	0	ILLUMINA	DGRP
	SRX006309	SRR018618	85601556	36	SINGLE	0	ILLUMINA	DGRP
	SRX006309	SRR018619	93209364	36	SINGLE	0	ILLUMINA	DGRP
	SRX006309	SRR018620	92307744	36	SINGLE	0	ILLUMINA	DGRP
	SRX006309	SRR018621	65875428	36	SINGLE	0	ILLUMINA	DGRP
	SRX006309	SRR018622	89677620	36	SINGLE	0	ILLUMINA	DGRP
	SRX006309	SRR018623	87866784	36	SINGLE	0	ILLUMINA	DGRP
	SRX006309	SRR018624	80886240	36	SINGLE	0	ILLUMINA	DGRP
	SRX006309	SRR018625	84944340	36	SINGLE	0	ILLUMINA	DGRP
	SRX006309	SRR018626	85327704	36	SINGLE	0	ILLUMINA	DGRP
	SRX006309	SRR018627	62960976	36	SINGLE	0	ILLUMINA	DGRP
	SRX006309	SRR018628	78076152	36	SINGLE	0	ILLUMINA	DGRP
	SRX006309	SRR018629	68158008	36	SINGLE	0	ILLUMINA	DGRP
	SRX006309	SRR018630	62580996	36	SINGLE	0	ILLUMINA	DGRP
	SRX006309	SRR018631	48104352	36	SINGLE	0	ILLUMINA	DGRP
	SRX006309	SRR018632	90175824	36	SINGLE	0	ILLUMINA	DGRP
	SRX006309	SRR018633	47387160	36	SINGLE	0	ILLUMINA	DGRP
	SRX006309	SRR018634	45336384	36	SINGLE	0	ILLUMINA	DGRP
	SRX006309	SRR018635	44651628	36	SINGLE	0	ILLUMINA	DGRP
	SRX006309	SRR018636	96807060	36	SINGLE	0	ILLUMINA	DGRP
	SRX155999	SRR516008	6994955750	125	PAIRED	300	ILLUMINA	DGRP
	SRX016257	SRR035057	151249348	274	SINGLE	0	LS454	DGRP
	SRX016257	SRR035058	106144259	276	SINGLE	0	LS454	DGRP
	SRX016257	SRR035059	119141550	276	SINGLE	0	LS454	DGRP
	SRX016257	SRR035074	101272705	270	SINGLE	0	LS454	DGRP
	SRX016257	SRR035077	126191678	269	SINGLE	0	LS454	DGRP
	SRX016258	SRR035060	113652595	275	SINGLE	0	LS454	DGRP
	SRX016258	SRR035061	143069613	295	SINGLE	0	LS454	DGRP
	SRX016258	SRR035062	151919699	276	SINGLE	0	LS454	DGRP
	SRX016258	SRR035063	120742472	274	SINGLE	0	LS454	DGRP
	SRX016258	SRR035064	137790250	272	SINGLE	0	LS454	DGRP
	SRX016258	SRR035065	135447325	281	SINGLE	0	LS454	DGRP
	SRX016258	SRR035066	131039188	274	SINGLE	0	LS454	DGRP
	SRX016258	SRR035067	145951686	271	SINGLE	0	LS454	DGRP
	SRX016258	SRR035068	111472956	277	SINGLE	0	LS454	DGRP
	SRX016258	SRR035069	138970013	272	SINGLE	0	LS454	DGRP
	SRX016258	SRR035070	86674289	274	SINGLE	0	LS454	DGRP
	SRX016258	SRR035071	122266162	272	SINGLE	0	LS454	DGRP
	SRX016258	SRR035072	127929833	292	SINGLE	0	LS454	DGRP
	SRX016258	SRR035073	113641469	275	SINGLE	0	LS454	DGRP
	SRX016258	SRR035075	155099434	272	SINGLE	0	LS454	DGRP
	SRX016258	SRR035076	146428257	273	SINGLE	0	LS454	DGRP
	SRX000534	SRR001946	617266656	36	SINGLE	0	ILLUMINA	DPGP
	SRX000534	SRR001947	592391952	36	SINGLE	0	ILLUMINA	DPGP
	SRX000534	SRR001948	265149144	36	SINGLE	0	ILLUMINA	DPGP
	SRX000534	SRR001949	622428624	36	SINGLE	0	ILLUMINA	DPGP
	SRX000534	SRR001950	626263272	36	SINGLE	0	ILLUMINA	DPGP
RAL_362	SRX006287	SRR029164	850515840	45	PAIRED	200	ILLUMINA	DGRP	39.4
	SRX006288	SRR029165	429513900	75	SINGLE	0	ILLUMINA	DGRP
	SRX006288	SRR029166	1013623200	75	SINGLE	0	ILLUMINA	DGRP
	SRX157914	SRR518867	632798977	521	SINGLE	0	LS454	DGRP
	SRX157914	SRR518868	276176580	528	SINGLE	0	LS454	DGRP
	SRX157914	SRR518871	197720793	538	SINGLE	0	LS454	DGRP
	SRX157914	SRR518872	306709096	552	SINGLE	0	LS454	DGRP
	SRX157914	SRR518873	333971116	522	SINGLE	0	LS454	DGRP
	SRX157915	SRR518869	257829991	532	SINGLE	0	LS454	DGRP
	SRX157915	SRR518870	604012217	531	SINGLE	0	LS454	DGRP
	SRX022277	SRR058221	235228356	36	SINGLE	0	ILLUMINA	DPGP
	SRX022277	SRR058222	437154876	36	SINGLE	0	ILLUMINA	DPGP
	SRX022277	SRR058223	376318656	36	SINGLE	0	ILLUMINA	DPGP
	SRX022277	SRR058224	396157572	36	SINGLE	0	ILLUMINA	DPGP
	SRX022277	SRR058225	303625764	36	SINGLE	0	ILLUMINA	DPGP
RAL_365	SRX006289	SRR018579	827774820	45	PAIRED	200	ILLUMINA	DGRP	54.7
	SRX006290	SRR018580	1514636400	75	PAIRED	200	ILLUMINA	DGRP
	SRX006291	SRR018581	944103300	75	SINGLE	0	ILLUMINA	DGRP
	SRX015863	SRR034279	689463271	524	SINGLE	0	LS454	DGRP
	SRX015863	SRR034280	795169266	562	SINGLE	0	LS454	DGRP
	SRX015863	SRR034281	322242653	540	SINGLE	0	LS454	DGRP
	SRX015863	SRR034282	721824243	528	SINGLE	0	LS454	DGRP
	SRX015863	SRR034283	704563570	534	SINGLE	0	LS454	DGRP
	SRX000537	SRR001955	460527624	36	SINGLE	0	ILLUMINA	DPGP
	SRX000537	SRR001956	366968880	36	SINGLE	0	ILLUMINA	DPGP
	SRX000537	SRR001957	460463364	36	SINGLE	0	ILLUMINA	DPGP
	SRX000537	SRR001958	461587248	36	SINGLE	0	ILLUMINA	DPGP
	SRX000537	SRR001959	330803748	36	SINGLE	0	ILLUMINA	DPGP
	SRX000537	SRR058231	152897940	36	SINGLE	0	ILLUMINA	DPGP
	SRX000537	SRR065490	485138628	36	SINGLE	0	ILLUMINA	DPGP
RAL_375	SRX006148	SRR018287	582620220	45	PAIRED	200	ILLUMINA	DGRP	73.7
	SRX006148	SRR018288	921347820	45	PAIRED	200	ILLUMINA	DGRP
	SRX006148	SRR018289	840811950	45	PAIRED	200	ILLUMINA	DGRP
	SRX006149	SRR018290	1943247600	75	PAIRED	200	ILLUMINA	DGRP
	SRX006150	SRR018291	1912788450	75	PAIRED	200	ILLUMINA	DGRP
	SRX015864	SRR034284	653731192	528	SINGLE	0	LS454	DGRP
	SRX015864	SRR034285	663024433	523	SINGLE	0	LS454	DGRP
	SRX015864	SRR034286	674122234	539	SINGLE	0	LS454	DGRP
	SRX015864	SRR034287	713706320	535	SINGLE	0	LS454	DGRP
	SRX015864	SRR034288	305951168	540	SINGLE	0	LS454	DGRP
	SRX000538	SRR001960	749517552	36	SINGLE	0	ILLUMINA	DPGP
	SRX000538	SRR001961	722561760	36	SINGLE	0	ILLUMINA	DPGP
	SRX000538	SRR001962	316949832	36	SINGLE	0	ILLUMINA	DPGP
	SRX000538	SRR001963	744463980	36	SINGLE	0	ILLUMINA	DPGP
	SRX000538	SRR001964	683779788	36	SINGLE	0	ILLUMINA	DPGP
RAL_379	SRX006292	SRR018582	855313200	45	PAIRED	200	ILLUMINA	DGRP	49.8
	SRX006293	SRR018583	457730325	75	SINGLE	0	ILLUMINA	DGRP
	SRX006293	SRR018584	929495025	75	SINGLE	0	ILLUMINA	DGRP
	SRX015865	SRR034289	582238493	534	SINGLE	0	LS454	DGRP
	SRX015865	SRR034290	767094698	543	SINGLE	0	LS454	DGRP
	SRX015865	SRR034291	705944994	532	SINGLE	0	LS454	DGRP
	SRX015865	SRR034292	615002314	547	SINGLE	0	LS454	DGRP
	SRX015865	SRR034293	743544125	547	SINGLE	0	LS454	DGRP
	SRX000539	SRR001965	463486824	36	SINGLE	0	ILLUMINA	DPGP
	SRX000539	SRR001966	491760648	36	SINGLE	0	ILLUMINA	DPGP
	SRX000539	SRR001967	468394524	36	SINGLE	0	ILLUMINA	DPGP
	SRX000539	SRR001968	472828392	36	SINGLE	0	ILLUMINA	DPGP
	SRX000539	SRR001969	469327500	36	SINGLE	0	ILLUMINA	DPGP
	SRX000539	SRR058242	146794320	36	SINGLE	0	ILLUMINA	DPGP
	SRX000539	SRR058243	231018912	36	SINGLE	0	ILLUMINA	DPGP
RAL_380	SRX006300	SRR018591	1486859800	148	SINGLE	0	ILLUMINA	DGRP	69.3
	SRX006300	SRR018592	1528571700	75	PAIRED	200	ILLUMINA	DGRP
	SRX006300	SRR018593	1545400500	75	PAIRED	200	ILLUMINA	DGRP
	SRX006301	SRR018594	22727880	45	SINGLE	0	ILLUMINA	DGRP
	SRX006302	SRR018595	418690650	75	SINGLE	0	ILLUMINA	DGRP
	SRX006303	SRR018596	415352250	75	SINGLE	0	ILLUMINA	DGRP
	SRX006303	SRR018597	501006300	75	SINGLE	0	ILLUMINA	DGRP
	SRX015866	SRR034294	708314661	550	SINGLE	0	LS454	DGRP
	SRX015866	SRR034295	618532480	553	SINGLE	0	LS454	DGRP
	SRX015866	SRR034296	661372297	551	SINGLE	0	LS454	DGRP
	SRX015866	SRR034297	703146021	575	SINGLE	0	LS454	DGRP
	SRX015866	SRR034298	355413686	554	SINGLE	0	LS454	DGRP
	SRX000556	SRR001970	576179964	36	SINGLE	0	ILLUMINA	DPGP
	SRX000556	SRR001971	441766800	36	SINGLE	0	ILLUMINA	DPGP
	SRX000556	SRR001972	626866560	36	SINGLE	0	ILLUMINA	DPGP
	SRX000556	SRR001973	487765188	36	SINGLE	0	ILLUMINA	DPGP
	SRX000556	SRR001974	589534020	36	SINGLE	0	ILLUMINA	DPGP
RAL_391	SRX006151	SRR018292	1101746700	45	PAIRED	200	ILLUMINA	DGRP	75.7
	SRX006151	SRR018293	768973050	45	PAIRED	200	ILLUMINA	DGRP
	SRX006152	SRR018294	1419558000	75	PAIRED	200	ILLUMINA	DGRP
	SRX023452	SRR060098	3602503930	95	PAIRED	200	ILLUMINA	DGRP
	SRX015867	SRR034299	706529497	517	SINGLE	0	LS454	DGRP
	SRX015867	SRR034300	347763376	524	SINGLE	0	LS454	DGRP
	SRX015867	SRR034301	779234643	559	SINGLE	0	LS454	DGRP
	SRX015867	SRR034302	669509987	516	SINGLE	0	LS454	DGRP
	SRX015867	SRR034303	643167959	521	SINGLE	0	LS454	DGRP
	SRX000557	SRR001975	471776400	36	SINGLE	0	ILLUMINA	DPGP
	SRX000557	SRR001976	405755748	36	SINGLE	0	ILLUMINA	DPGP
	SRX000557	SRR001977	556586244	36	SINGLE	0	ILLUMINA	DPGP
	SRX000557	SRR001978	494420796	36	SINGLE	0	ILLUMINA	DPGP
	SRX000557	SRR001979	542737080	36	SINGLE	0	ILLUMINA	DPGP
	SRX000557	SRR058253	258632424	36	SINGLE	0	ILLUMINA	DPGP
RAL_399	SRX006153	SRR018295	1029772980	45	PAIRED	200	ILLUMINA	DGRP	53.1
	SRX006153	SRR018296	815763960	45	PAIRED	200	ILLUMINA	DGRP
	SRX006154	SRR018297	1099885350	75	PAIRED	200	ILLUMINA	DGRP
	SRX015868	SRR034304	745896262	568	SINGLE	0	LS454	DGRP
	SRX015868	SRR034305	598773174	547	SINGLE	0	LS454	DGRP
	SRX015868	SRR034306	633788721	542	SINGLE	0	LS454	DGRP
	SRX015868	SRR034307	632774981	550	SINGLE	0	LS454	DGRP
	SRX015868	SRR034308	604217374	556	SINGLE	0	LS454	DGRP
	SRX000558	SRR001980	638404236	36	SINGLE	0	ILLUMINA	DPGP
	SRX000558	SRR001981	288056052	36	SINGLE	0	ILLUMINA	DPGP
	SRX000558	SRR001982	654167232	36	SINGLE	0	ILLUMINA	DPGP
	SRX000558	SRR001983	519949152	36	SINGLE	0	ILLUMINA	DPGP
	SRX000558	SRR001984	691120224	36	SINGLE	0	ILLUMINA	DPGP
RAL_427	SRX006155	SRR018298	853374690	45	PAIRED	200	ILLUMINA	DGRP	53.1
	SRX006155	SRR018299	1010712150	45	PAIRED	200	ILLUMINA	DGRP
	SRX006155	SRR018300	1020725280	45	PAIRED	200	ILLUMINA	DGRP
	SRX016041	SRR034495	695491396	537	SINGLE	0	LS454	DGRP
	SRX016041	SRR034496	627786670	531	SINGLE	0	LS454	DGRP
	SRX016041	SRR034497	712351323	536	SINGLE	0	LS454	DGRP
	SRX016041	SRR034498	687426577	634	SINGLE	0	LS454	DGRP
	SRX016041	SRR034499	553135884	537	SINGLE	0	LS454	DGRP
	SRX000528	SRR001926	467903304	36	SINGLE	0	ILLUMINA	DPGP
	SRX000528	SRR001927	352727568	36	SINGLE	0	ILLUMINA	DPGP
	SRX000528	SRR001928	611245656	36	SINGLE	0	ILLUMINA	DPGP
	SRX000528	SRR001929	530512308	36	SINGLE	0	ILLUMINA	DPGP
	SRX000528	SRR001930	588961368	36	SINGLE	0	ILLUMINA	DPGP
	SRX000528	SRR058264	251634132	36	SINGLE	0	ILLUMINA	DPGP
RAL_437	SRX006156	SRR018301	1009360620	45	PAIRED	200	ILLUMINA	DGRP	86
	SRX006156	SRR018302	935002260	45	PAIRED	200	ILLUMINA	DGRP
	SRX156001	SRR516010	6312809500	125	PAIRED	300	ILLUMINA	DGRP
	SRX016042	SRR034500	766812716	549	SINGLE	0	LS454	DGRP
	SRX016042	SRR034501	724572962	549	SINGLE	0	LS454	DGRP
	SRX016042	SRR034502	638018709	546	SINGLE	0	LS454	DGRP
	SRX016042	SRR034503	710390896	543	SINGLE	0	LS454	DGRP
	SRX010938	SRR026799	231622020	36	SINGLE	0	ILLUMINA	DPGP
	SRX010938	SRR026800	345825072	36	SINGLE	0	ILLUMINA	DPGP
	SRX010938	SRR026806	404212536	36	SINGLE	0	ILLUMINA	DPGP
	SRX010938	SRR026807	414027792	36	SINGLE	0	ILLUMINA	DPGP
	SRX010938	SRR026955	376114104	36	SINGLE	0	ILLUMINA	DPGP
	SRX010938	SRR026956	371353068	36	SINGLE	0	ILLUMINA	DPGP
	SRX010938	SRR026978	256291884	36	SINGLE	0	ILLUMINA	DPGP
	SRX010938	SRR026979	261839880	36	SINGLE	0	ILLUMINA	DPGP
	SRX010938	SRR026992	379194264	36	SINGLE	0	ILLUMINA	DPGP
	SRX010938	SRR026993	376908660	36	SINGLE	0	ILLUMINA	DPGP
RAL_486	SRX006157	SRR018303	894829140	45	PAIRED	200	ILLUMINA	DGRP	41.9
	SRX006157	SRR018304	787766760	45	PAIRED	200	ILLUMINA	DGRP
	SRX016043	SRR034504	770183894	626	SINGLE	0	LS454	DGRP
	SRX016043	SRR034505	688808084	536	SINGLE	0	LS454	DGRP
	SRX016043	SRR034506	634552146	556	SINGLE	0	LS454	DGRP
	SRX016043	SRR034507	706003511	574	SINGLE	0	LS454	DGRP
	SRX016043	SRR034508	671092531	542	SINGLE	0	LS454	DGRP
	SRX022286	SRR058271	183064752	36	SINGLE	0	ILLUMINA	DPGP
	SRX022286	SRR058272	351414504	36	SINGLE	0	ILLUMINA	DPGP
	SRX022286	SRR058273	399417912	36	SINGLE	0	ILLUMINA	DPGP
	SRX022286	SRR058274	449540388	36	SINGLE	0	ILLUMINA	DPGP
	SRX022286	SRR058275	367606296	36	SINGLE	0	ILLUMINA	DPGP
	SRX022286	SRR058276	173964060	36	SINGLE	0	ILLUMINA	DPGP
RAL_514	SRX006158	SRR018305	1777364250	75	PAIRED	200	ILLUMINA	DGRP	51.3
	SRX006158	SRR018306	1676555100	75	PAIRED	200	ILLUMINA	DGRP
	SRX016071	SRR034673	618836681	547	SINGLE	0	LS454	DGRP
	SRX016071	SRR034674	215142198	551	SINGLE	0	LS454	DGRP
	SRX016071	SRR034675	561372903	537	SINGLE	0	LS454	DGRP
	SRX016071	SRR034676	574940885	527	SINGLE	0	LS454	DGRP
	SRX016071	SRR034677	611631965	550	SINGLE	0	LS454	DGRP
	SRX016071	SRR034678	634713815	545	SINGLE	0	LS454	DGRP
	SRX016071	SRR034679	298151761	545	SINGLE	0	LS454	DGRP
	SRX022287	SRR058277	262145952	36	SINGLE	0	ILLUMINA	DPGP
	SRX022287	SRR058278	389262240	36	SINGLE	0	ILLUMINA	DPGP
	SRX022287	SRR058279	318131640	36	SINGLE	0	ILLUMINA	DPGP
	SRX022287	SRR058280	326834532	36	SINGLE	0	ILLUMINA	DPGP
	SRX022287	SRR058281	394127352	36	SINGLE	0	ILLUMINA	DPGP
RAL_517	SRX024362	SRR061748	1930204500	75	PAIRED	200	ILLUMINA	DGRP	69.6
	SRX024362	SRR061749	1409632350	75	PAIRED	200	ILLUMINA	DGRP
	SRX024363	SRR061750	747533160	45	PAIRED	200	ILLUMINA	DGRP
	SRX024363	SRR061751	924800760	45	PAIRED	200	ILLUMINA	DGRP
	SRX024363	SRR061752	945986040	45	PAIRED	200	ILLUMINA	DGRP
	SRX024363	SRR061753	756936630	45	PAIRED	200	ILLUMINA	DGRP
	SRX016209	SRR034845	649395489	525	SINGLE	0	LS454	DGRP
	SRX016210	SRR034841	747930479	552	SINGLE	0	LS454	DGRP
	SRX016210	SRR034842	771777020	551	SINGLE	0	LS454	DGRP
	SRX016210	SRR034843	250072929	547	SINGLE	0	LS454	DGRP
	SRX016210	SRR034844	804905840	543	SINGLE	0	LS454	DGRP
	SRX022288	SRR058282	271985904	36	SINGLE	0	ILLUMINA	DPGP
	SRX022288	SRR058283	394614036	36	SINGLE	0	ILLUMINA	DPGP
	SRX022288	SRR058284	338745096	36	SINGLE	0	ILLUMINA	DPGP
	SRX022288	SRR058285	380748096	36	SINGLE	0	ILLUMINA	DPGP
	SRX022288	SRR058286	425002104	36	SINGLE	0	ILLUMINA	DPGP
RAL_555	SRX006159	SRR018307	1878540300	75	PAIRED	200	ILLUMINA	DGRP	52.4
	SRX006159	SRR018308	1879245450	75	PAIRED	200	ILLUMINA	DGRP
	SRX016072	SRR034536	730723734	562	SINGLE	0	LS454	DGRP
	SRX016072	SRR034537	343764383	551	SINGLE	0	LS454	DGRP
	SRX016072	SRR034538	738319879	537	SINGLE	0	LS454	DGRP
	SRX016072	SRR034539	731072287	552	SINGLE	0	LS454	DGRP
	SRX016072	SRR034540	682566876	540	SINGLE	0	LS454	DGRP
	SRX022289	SRR058287	235587600	36	SINGLE	0	ILLUMINA	DPGP
	SRX022289	SRR058288	315326376	36	SINGLE	0	ILLUMINA	DPGP
	SRX022289	SRR058289	392108652	36	SINGLE	0	ILLUMINA	DPGP
	SRX022289	SRR058290	425664396	36	SINGLE	0	ILLUMINA	DPGP
	SRX022289	SRR058291	320248080	36	SINGLE	0	ILLUMINA	DPGP
	SRX022289	SRR058292	165774672	36	SINGLE	0	ILLUMINA	DPGP
RAL_639	SRX006160	SRR018309	1298018850	75	PAIRED	200	ILLUMINA	DGRP	48.6
	SRX006161	SRR018310	1861011150	75	PAIRED	200	ILLUMINA	DGRP
	SRX016339	SRR035232	390301819	534	SINGLE	0	LS454	DGRP
	SRX016339	SRR035233	745078427	540	SINGLE	0	LS454	DGRP
	SRX016339	SRR035234	718626877	564	SINGLE	0	LS454	DGRP
	SRX016339	SRR035235	720076781	549	SINGLE	0	LS454	DGRP
	SRX016339	SRR035236	647961610	530	SINGLE	0	LS454	DGRP
	SRX022290	SRR058293	370316592	36	SINGLE	0	ILLUMINA	DPGP
	SRX022290	SRR058294	412726752	36	SINGLE	0	ILLUMINA	DPGP
	SRX022290	SRR058295	364849380	36	SINGLE	0	ILLUMINA	DPGP
	SRX022290	SRR058296	329455872	36	SINGLE	0	ILLUMINA	DPGP
	SRX022290	SRR058297	344614608	36	SINGLE	0	ILLUMINA	DPGP
RAL_705	SRX006162	SRR018311	1743594900	75	PAIRED	200	ILLUMINA	DGRP	50.6
	SRX006162	SRR018312	1781900700	75	PAIRED	200	ILLUMINA	DGRP
	SRX016134	SRR034662	704813940	532	SINGLE	0	LS454	DGRP
	SRX016134	SRR034663	693309255	544	SINGLE	0	LS454	DGRP
	SRX016134	SRR034664	646716189	536	SINGLE	0	LS454	DGRP
	SRX016134	SRR034665	192217939	561	SINGLE	0	LS454	DGRP
	SRX016134	SRR034666	743835396	539	SINGLE	0	LS454	DGRP
	SRX016134	SRR034667	151319583	519	SINGLE	0	LS454	DGRP
	SRX022291	SRR058298	230569380	36	SINGLE	0	ILLUMINA	DPGP
	SRX022291	SRR058299	270732492	36	SINGLE	0	ILLUMINA	DPGP
	SRX022291	SRR058300	413275896	36	SINGLE	0	ILLUMINA	DPGP
	SRX022291	SRR058301	445968792	36	SINGLE	0	ILLUMINA	DPGP
	SRX022291	SRR058302	357291900	36	SINGLE	0	ILLUMINA	DPGP
	SRX022291	SRR058303	162633276	36	SINGLE	0	ILLUMINA	DPGP
RAL_707	SRX006163	SRR018313	1725152400	75	PAIRED	200	ILLUMINA	DGRP	51.1
	SRX006163	SRR018314	1774152900	75	PAIRED	200	ILLUMINA	DGRP
	SRX016135	SRR034668	338847469	528	SINGLE	0	LS454	DGRP
	SRX016135	SRR034669	646477417	536	SINGLE	0	LS454	DGRP
	SRX016135	SRR034670	799386451	552	SINGLE	0	LS454	DGRP
	SRX016135	SRR034671	735494897	557	SINGLE	0	LS454	DGRP
	SRX016135	SRR034672	757352912	531	SINGLE	0	LS454	DGRP
	SRX022292	SRR058304	294649092	36	SINGLE	0	ILLUMINA	DPGP
	SRX022292	SRR058305	122467536	36	SINGLE	0	ILLUMINA	DPGP
	SRX022292	SRR058306	386216712	36	SINGLE	0	ILLUMINA	DPGP
	SRX022292	SRR058307	184866624	36	SINGLE	0	ILLUMINA	DPGP
	SRX022292	SRR058308	424578204	36	SINGLE	0	ILLUMINA	DPGP
	SRX022292	SRR058309	440517528	36	SINGLE	0	ILLUMINA	DPGP
RAL_712	SRX006164	SRR018315	1625462850	75	PAIRED	200	ILLUMINA	DGRP	48.4
	SRX006164	SRR018316	1726127250	75	PAIRED	200	ILLUMINA	DGRP
	SRX016136	SRR034680	276489023	541	SINGLE	0	LS454	DGRP
	SRX016136	SRR034681	586001405	526	SINGLE	0	LS454	DGRP
	SRX016136	SRR034682	705856058	522	SINGLE	0	LS454	DGRP
	SRX016136	SRR034683	706723101	528	SINGLE	0	LS454	DGRP
	SRX016136	SRR034684	661087790	519	SINGLE	0	LS454	DGRP
	SRX022293	SRR058310	349014240	36	SINGLE	0	ILLUMINA	DPGP
	SRX022293	SRR058311	135480564	36	SINGLE	0	ILLUMINA	DPGP
	SRX022293	SRR058312	375473232	36	SINGLE	0	ILLUMINA	DPGP
	SRX022293	SRR058313	198300636	36	SINGLE	0	ILLUMINA	DPGP
	SRX022293	SRR058314	379941696	36	SINGLE	0	ILLUMINA	DPGP
	SRX022293	SRR058315	440297568	36	SINGLE	0	ILLUMINA	DPGP
RAL_714	SRX006165	SRR018317	1414204350	75	PAIRED	200	ILLUMINA	DGRP	48.3
	SRX006166	SRR018318	1742614800	75	PAIRED	200	ILLUMINA	DGRP
	SRX016137	SRR034744	252101168	544	SINGLE	0	LS454	DGRP
	SRX016137	SRR034745	506681855	545	SINGLE	0	LS454	DGRP
	SRX016137	SRR034746	386502428	542	SINGLE	0	LS454	DGRP
	SRX016137	SRR034747	598685175	551	SINGLE	0	LS454	DGRP
	SRX016137	SRR034748	697991493	555	SINGLE	0	LS454	DGRP
	SRX016137	SRR034749	662605864	540	SINGLE	0	LS454	DGRP
	SRX022294	SRR058316	361333008	36	SINGLE	0	ILLUMINA	DPGP
	SRX022294	SRR058317	99500544	36	SINGLE	0	ILLUMINA	DPGP
	SRX022294	SRR058318	404208936	36	SINGLE	0	ILLUMINA	DPGP
	SRX022294	SRR058319	193359888	36	SINGLE	0	ILLUMINA	DPGP
	SRX022294	SRR058320	397467000	36	SINGLE	0	ILLUMINA	DPGP
	SRX022294	SRR058321	432735804	36	SINGLE	0	ILLUMINA	DPGP
RAL_730	SRX006308	SRR018606	750250275	75	SINGLE	0	ILLUMINA	DGRP	45.4
	SRX006308	SRR018607	602544075	75	SINGLE	0	ILLUMINA	DGRP
	SRX006308	SRR018608	712973400	75	SINGLE	0	ILLUMINA	DGRP
	SRX006308	SRR018609	785668125	75	SINGLE	0	ILLUMINA	DGRP
	SRX016138	SRR034686	731288288	533	SINGLE	0	LS454	DGRP
	SRX016138	SRR034687	710386665	531	SINGLE	0	LS454	DGRP
	SRX016138	SRR034688	747199760	544	SINGLE	0	LS454	DGRP
	SRX016138	SRR034689	731426319	531	SINGLE	0	LS454	DGRP
	SRX022295	SRR058322	353498112	36	SINGLE	0	ILLUMINA	DPGP
	SRX022295	SRR058323	119036916	36	SINGLE	0	ILLUMINA	DPGP
	SRX022295	SRR058324	389795184	36	SINGLE	0	ILLUMINA	DPGP
	SRX022295	SRR058325	192913704	36	SINGLE	0	ILLUMINA	DPGP
	SRX022295	SRR058326	416315340	36	SINGLE	0	ILLUMINA	DPGP
	SRX022295	SRR058327	414704160	36	SINGLE	0	ILLUMINA	DPGP
RAL_732	SRX006167	SRR018319	1456323300	75	PAIRED	200	ILLUMINA	DGRP	44
	SRX006167	SRR018320	1706452500	75	PAIRED	200	ILLUMINA	DGRP
	SRX157997	SRR518968	453895719	518	SINGLE	0	LS454	DGRP
	SRX157997	SRR518969	658805397	513	SINGLE	0	LS454	DGRP
	SRX157997	SRR518970	327303783	503	SINGLE	0	LS454	DGRP
	SRX157997	SRR518971	303321618	508	SINGLE	0	LS454	DGRP
	SRX157997	SRR518972	692844055	502	SINGLE	0	LS454	DGRP
	SRX022296	SRR058328	191204712	36	SINGLE	0	ILLUMINA	DPGP
	SRX022296	SRR058329	440132256	36	SINGLE	0	ILLUMINA	DPGP
	SRX022296	SRR058330	136810944	36	SINGLE	0	ILLUMINA	DPGP
	SRX022296	SRR058331	396716148	36	SINGLE	0	ILLUMINA	DPGP
	SRX022296	SRR058332	372813156	36	SINGLE	0	ILLUMINA	DPGP
	SRX022296	SRR058362	292558140	36	SINGLE	0	ILLUMINA	DPGP
RAL_765	SRX006168	SRR018321	1252271550	75	PAIRED	200	ILLUMINA	DGRP	45.7
	SRX006169	SRR018322	1739736600	75	PAIRED	200	ILLUMINA	DGRP
	SRX016176	SRR034754	740749857	521	SINGLE	0	LS454	DGRP
	SRX016176	SRR034755	741989685	520	SINGLE	0	LS454	DGRP
	SRX016176	SRR034756	792982771	521	SINGLE	0	LS454	DGRP
	SRX016176	SRR034757	755558976	517	SINGLE	0	LS454	DGRP
	SRX022297	SRR058333	361561608	36	SINGLE	0	ILLUMINA	DPGP
	SRX022297	SRR058334	401561100	36	SINGLE	0	ILLUMINA	DPGP
	SRX022297	SRR058335	155807604	36	SINGLE	0	ILLUMINA	DPGP
	SRX022297	SRR058336	416701332	36	SINGLE	0	ILLUMINA	DPGP
	SRX022297	SRR058337	354259692	36	SINGLE	0	ILLUMINA	DPGP
RAL_774	SRX006170	SRR018323	825946290	45	PAIRED	200	ILLUMINA	DGRP	81.6
	SRX006170	SRR018324	1083591270	45	PAIRED	200	ILLUMINA	DGRP
	SRX156022	SRR516031	4248985500	125	PAIRED	300	ILLUMINA	DGRP
	SRX016175	SRR034750	805050498	526	SINGLE	0	LS454	DGRP
	SRX016175	SRR034751	663136541	518	SINGLE	0	LS454	DGRP
	SRX016175	SRR034752	690178093	520	SINGLE	0	LS454	DGRP
	SRX016175	SRR034753	744412886	534	SINGLE	0	LS454	DGRP
	SRX158004	SRR518981	572352396	518	SINGLE	0	LS454	DGRP
	SRX158004	SRR518982	514964296	512	SINGLE	0	LS454	DGRP
	SRX158004	SRR518983	478676756	521	SINGLE	0	LS454	DGRP
	SRX158005	SRR518984	546815374	511	SINGLE	0	LS454	DGRP
	SRX158005	SRR518985	544561962	511	SINGLE	0	LS454	DGRP
	SRX158005	SRR518986	315091011	501	SINGLE	0	LS454	DGRP
	SRX022298	SRR058338	187209252	36	SINGLE	0	ILLUMINA	DPGP
	SRX022298	SRR058339	413028180	36	SINGLE	0	ILLUMINA	DPGP
	SRX022298	SRR058340	166421412	36	SINGLE	0	ILLUMINA	DPGP
	SRX022298	SRR058341	408366828	36	SINGLE	0	ILLUMINA	DPGP
	SRX022298	SRR058342	362832156	36	SINGLE	0	ILLUMINA	DPGP
	SRX022298	SRR058363	204204348	36	SINGLE	0	ILLUMINA	DPGP
RAL_786	SRX006171	SRR018331	1049056560	45	PAIRED	200	ILLUMINA	DGRP	40.8
	SRX006171	SRR018332	1058729220	45	PAIRED	200	ILLUMINA	DGRP
	SRX016177	SRR034766	619840426	538	SINGLE	0	LS454	DGRP
	SRX016177	SRR034767	359144286	532	SINGLE	0	LS454	DGRP
	SRX016177	SRR034768	661281108	546	SINGLE	0	LS454	DGRP
	SRX016177	SRR034769	739476399	552	SINGLE	0	LS454	DGRP
	SRX016177	SRR034770	695704239	538	SINGLE	0	LS454	DGRP
	SRX022299	SRR058343	427777884	36	SINGLE	0	ILLUMINA	DPGP
	SRX022299	SRR058344	164830824	36	SINGLE	0	ILLUMINA	DPGP
	SRX022299	SRR058345	424534608	36	SINGLE	0	ILLUMINA	DPGP
	SRX022299	SRR058346	338326308	36	SINGLE	0	ILLUMINA	DPGP
	SRX022299	SRR058364	339748596	36	SINGLE	0	ILLUMINA	DPGP
RAL_799	SRX006172	SRR018325	1474552050	75	PAIRED	200	ILLUMINA	DGRP	46.9
	SRX006173	SRR018326	1629470100	75	PAIRED	200	ILLUMINA	DGRP
	SRX016178	SRR034771	744984219	535	SINGLE	0	LS454	DGRP
	SRX016178	SRR034772	717843825	534	SINGLE	0	LS454	DGRP
	SRX016178	SRR034773	668995281	532	SINGLE	0	LS454	DGRP
	SRX016178	SRR034774	770999584	545	SINGLE	0	LS454	DGRP
	SRX022300	SRR058347	269563968	36	SINGLE	0	ILLUMINA	DPGP
	SRX022300	SRR058348	416111652	36	SINGLE	0	ILLUMINA	DPGP
	SRX022300	SRR058349	458018064	36	SINGLE	0	ILLUMINA	DPGP
	SRX022300	SRR058350	365267196	36	SINGLE	0	ILLUMINA	DPGP
	SRX022300	SRR058351	392275152	36	SINGLE	0	ILLUMINA	DPGP
RAL_820	SRX006174	SRR018329	1325613900	75	PAIRED	200	ILLUMINA	DGRP	44.5
	SRX006175	SRR018330	1499371800	75	PAIRED	200	ILLUMINA	DGRP
	SRX016179	SRR034775	723480876	513	SINGLE	0	LS454	DGRP
	SRX016179	SRR034776	699928419	501	SINGLE	0	LS454	DGRP
	SRX016179	SRR034777	699760131	507	SINGLE	0	LS454	DGRP
	SRX016179	SRR034778	714837488	500	SINGLE	0	LS454	DGRP
	SRX022301	SRR058352	301264992	36	SINGLE	0	ILLUMINA	DPGP
	SRX022301	SRR058353	379267092	36	SINGLE	0	ILLUMINA	DPGP
	SRX022301	SRR058354	453313224	36	SINGLE	0	ILLUMINA	DPGP
	SRX022301	SRR058355	357336072	36	SINGLE	0	ILLUMINA	DPGP
	SRX022301	SRR058356	348226308	36	SINGLE	0	ILLUMINA	DPGP
RAL_852	SRX006304	SRR018598	82710630	45	PAIRED	200	ILLUMINA	DGRP	64.2
	SRX006304	SRR018599	886906080	45	PAIRED	200	ILLUMINA	DGRP
	SRX006304	SRR018600	1748961750	75	PAIRED	200	ILLUMINA	DGRP
	SRX006304	SRR018601	1938253500	75	PAIRED	200	ILLUMINA	DGRP
	SRX006304	SRR018602	910875870	45	PAIRED	200	ILLUMINA	DGRP
	SRX006305	SRR018603	765929325	75	SINGLE	0	ILLUMINA	DGRP
	SRX016300	SRR035128	145665732	271	SINGLE	0	LS454	DGRP
	SRX016300	SRR035129	109692576	270	SINGLE	0	LS454	DGRP
	SRX016300	SRR035130	171365765	269	SINGLE	0	LS454	DGRP
	SRX016300	SRR035131	164700635	272	SINGLE	0	LS454	DGRP
	SRX016300	SRR035132	162978323	270	SINGLE	0	LS454	DGRP
	SRX016300	SRR035134	100647247	270	SINGLE	0	LS454	DGRP
	SRX016300	SRR035136	120991336	269	SINGLE	0	LS454	DGRP
	SRX016300	SRR035137	156921176	270	SINGLE	0	LS454	DGRP
	SRX016300	SRR035138	169925667	270	SINGLE	0	LS454	DGRP
	SRX016300	SRR035139	172865990	269	SINGLE	0	LS454	DGRP
	SRX016300	SRR035140	162503094	269	SINGLE	0	LS454	DGRP
	SRX016300	SRR035141	112821287	272	SINGLE	0	LS454	DGRP
	SRX016300	SRR035142	136500116	268	SINGLE	0	LS454	DGRP
	SRX016300	SRR035143	94428615	270	SINGLE	0	LS454	DGRP
	SRX016300	SRR035144	174246959	270	SINGLE	0	LS454	DGRP
	SRX016300	SRR035145	155048442	269	SINGLE	0	LS454	DGRP
	SRX016301	SRR035133	166913216	276	SINGLE	0	LS454	DGRP
	SRX016301	SRR035135	142049431	270	SINGLE	0	LS454	DGRP
	SRX022302	SRR058357	318397752	36	SINGLE	0	ILLUMINA	DPGP
	SRX022302	SRR058358	396661032	36	SINGLE	0	ILLUMINA	DPGP
	SRX022302	SRR058359	449740620	36	SINGLE	0	ILLUMINA	DPGP
	SRX022302	SRR058360	336420000	36	SINGLE	0	ILLUMINA	DPGP
	SRX022302	SRR058361	369637488	36	SINGLE	0	ILLUMINA	DPGP
RAL_859	SRX006176	SRR018327	1591675350	75	PAIRED	200	ILLUMINA	DGRP	50.9
	SRX006176	SRR018328	1177286250	75	PAIRED	200	ILLUMINA	DGRP
	SRX016184	SRR034802	756366420	530	SINGLE	0	LS454	DGRP
	SRX016184	SRR034803	553297883	521	SINGLE	0	LS454	DGRP
	SRX016184	SRR034804	785952599	501	SINGLE	0	LS454	DGRP
	SRX016184	SRR034805	600558118	508	SINGLE	0	LS454	DGRP
	SRX016184	SRR034806	370405634	513	SINGLE	0	LS454	DGRP
	SRX010956	SRR026817	247380804	36	SINGLE	0	ILLUMINA	DPGP
	SRX010956	SRR026887	171542808	36	SINGLE	0	ILLUMINA	DPGP
	SRX010956	SRR026888	249778404	36	SINGLE	0	ILLUMINA	DPGP
	SRX010956	SRR026891	353449728	36	SINGLE	0	ILLUMINA	DPGP
	SRX010956	SRR026892	350654832	36	SINGLE	0	ILLUMINA	DPGP
	SRX010956	SRR026918	348000012	36	SINGLE	0	ILLUMINA	DPGP
	SRX010956	SRR026944	299302344	36	SINGLE	0	ILLUMINA	DPGP
	SRX010956	SRR026945	293723640	36	SINGLE	0	ILLUMINA	DPGP
	SRX010956	SRR026965	220148028	36	SINGLE	0	ILLUMINA	DPGP
	SRX010956	SRR026966	215790876	36	SINGLE	0	ILLUMINA	DPGP

## Sheet: S2
Supplemental Table 2. Sequence features of the 15 D. melanogaster polymorphic retrocopies.
“Frequency” is inferred by counting the DGRP strains where both exon-exon junction reads and exon-intron junction reads are present as detailed in the Methods. Due to the random fluctuation of sequencing depth this column may represent a lower-bound estimation of the real population frequency. Read numbers (columns: “exon_exon_read#”, “exon_intron_read#” and “intron_exon_read#”) were counted usin…
Parental gene	Exon_exon_read#	Exon_intron_read#	Intron_exon_read#	5’ truncation (bp)	3’ truncation (bp)	Replaced LTR (bp)	Note	poly(A)	TSD	TTTT/AA
CG17604	591	745	802	1016	507	2662	CDS-CDS	N	N	N
CG10212	219	261	330	2004	359	2641	CDS-CDS	N	N	N
CG32082	180	204	191	925	3617	2395	CDS-CDS	N	N	N
CG4799, CG11924	114, 20	95, 69	122, 36	1095, 72	1519, 2256	7893	5' UTR-5' UTR, CDS-3' UTR	N	N	N
CG5119, CR42443	104	1020	917	842, 35	991, NA	NA	CDS-CDS	UNKN	UNKN	N
CG33957	103	442	201	172	2962	2417	CDS-CDS	N	N	N
CG14796	89	129	110	3223	2110	2627	CDS-CDS	N	N	N
CG31605	69	109	95	245	NA	NA	5' UTR-3' UTR	UNKN	UNKN	N
CG8567	25	49	53	6	741	2706	5' UTR-CDS	N	N	N
CG2662	23	221	251	6	1254	2163	5' UTR-CDS	N	N	N
CG5020	17	32	23	1591	2564	2640	CDS-CDS	N	N	N
CG3631	16	35	39	562	500	832	5' UTR-3' UTR	N	N	N
CG1242	15	32	48	5	1793	7910	5' UTR-CDS	N	N	N
CG10652	12	50	53	40	268	2008	CDS-3' UTR	N	N	N
CG8392	10	24	24	419	NA	NA	CDS-3' UTR	UNKN	UNKN	N

## Sheet: S3
Supplemental Table 3. Characterization of the 31 candidate D. melanogaster polymorphic retrocopies with respect to whether they can be assembled.
The 15 retrocopies with at least one flanking region assembled were marked in light green. For the other 16 retrocopies, 12 have too few exon-exon spanning reads to be assembled; CG11584_r and CG8773_r have tandem duplications surrouding the exon junction causing a mapping problem; CG17111_r has only one intron lost suggesting either a DNA-level duplication event followed by intron loss or retrop…
Parental gene	Frequency	Exon_exon_read#	Exon_intron_read#	Intron_exon_read#	Note
CG17604	10	591	745	802	partiall mRNA; BLASTOPIA, Gypsy
CG10212	9	219	261	330	partial mRNA; BLASTOPIA, Gypsy
CG32082	3	180	204	191	partial mRNA; BLASTOPIA, Gypsy
CG11924	4	114	95	122	partial mRNA; BATUMI_I, Pao; template switching to CG4799
CG5119	31	104	1020	917	partial mRNA; STALKER2, Gypsy
CG33957	20	103	442	201	partial mRNA; BLASTOPIA, Gypsy
CG14796	8	89	129	110	partial mRNA; MAX, Pao
CG31605	2	69	109	95	partial mRNA; TABOR, Gypsy
CG17111	1	64	33	26	only one intron of 56 bp is lost in the assembled sequences, while the other introns are present
CG7300	10	61	50	94	the exon-intron junction sequence is tandem duplcated
CG8567	1	25	49	53	partial mRNA; 412, Gypsy
CG2662	9	23	221	251	partial mRNA; 412, Gypsy
CG3164	15	20	446	474	there is only 1 or 2 exon-exon spanning reads in each line causing assemlby failure
CG4799	4	20	69	36	partial mRNA; BATUMI, Pao; template switching to CG11924
CG5020	1	17	32	23	partial mRNA; BLASTOPIA, Gypsy
CG3631	1	16	35	39	partial mRNA; Gypsy5, Gypsy
CG1242	2	15	32	48	partial mRNA; MAX, Pao
CG11584	5	15	28	13	the exon-exon junction sequence is tandem duplicated
CG10652	2	12	50	53	partial mRNA; 412, Gypsy
CG2033	8	11	200	186	full length; fixed retrogene CG12324
CG8392	1	10	24	24	partial mRNA; 412, Gypsy
CG8773	4	5	133	131	there is only 1 or 2 reads in each line; furthermore, the exon-exon junction sequence is duplicated
CG9086	4	5	44	45	there is only 1 or 2 reads in each line; the reads are only 36 bp
CG4843	3	4	94	125	there is only 1 or 2 reads in each line; these exon-exon reads can be better mapped to Acetobacter pasteurianusgenome (a microorganism often found in lab fly)
CG7558	1	3	45	39	assembly failure
CG9894	1	3	11	12	assembly failure
CG40129	1	2	180	178	assembly failure
CG30344	1	2	120	132	assembly failure
CG33956	1	2	30	38	assembly failure
CG1771	1	2	29	31	assembly failure
CG17839	1	2	13	13	assembly failure
CG30069	1	2	9	12	assembly failure

## Sheet: S4
Supplemental Table 4. Primer sequences and expected band sizes for the PCR validation assays.
CG4799_CG11924 is a chimeric retrocopy consisting of sequences from two parental genes. For this retrocopy the primers were designed to flank the breakpoint between the sequences of the two parental genes. As a consequence no product is amplified in the reference line (iso-1) that does not contain this retrocopy (0 bp expected size).
Gene ID	Line	Primer (5'-3')	Retro length (bp)	Parental length (bp)
CG17604	303	GAAGGCCACTGAAGTTGAGA	272	545
		GCCCTTTGGAATCTTTTAGC
CG32082	399	CTATTGGTGCCATTGGAGAC	376	780
		CAATCTCTTGCCAATTTTCG
CG5119	303	ACGAGGCAATGAGCTTCTC	70	141
		ACAGTTGCATCAGACCCAG
CG33957	714	GGCTAAGGAGAAGGAACTGC	262	361
		GTTAGCCACGGCTTCCTTAG
CG14796	380	TGTGTGCATGCAGTATTGGT	100	200
		AAAACTCCACCTCCTCGACT
CG31605	859	TGTGGAGGGTGAAAAGATGT	191	225
		ATTTGTATTCGCCTCTGTCG
CG2662	306	CAACTTGTTCCGTATCGGTT	111	176
		ACACATAGTTGTCCGAGGGA
CG5020	437	GGCTCAGTCACAGGTTTACAA	269	331
		ACTGTAGAGTGGCGATTTGC
CG3631	335	TCGGTGCCAACTTCTACTTT	281	443
		TTCTAAAAGCTGTCCCATCG
CG4799_CG11924	427	CAGTTTCACCGACACATTCA	625	0
		GCTTCGCCTGTGTGTATCTT

## Sheet: S5
Supplemental Table 5. Statistics for newly generated DNA and RNA sequencing data.
A pooled DNA sample from the lines 208, 303, 307, 379, 399 and 517 was sequenced six times. Line 437 was sequenced using the 5 kb mate-pair technique. The RNA-seq data of the three tissues in line 208 is strand-specific and was generated using dUTP method.
Line	NCBI		GSA		Read length	Library layout	Insert size	Platform	Volumn (GB)
	Experiment accession	Run	Experiment accession	Run
RAL_6lines_1	SRX1012035	SRR2000043	CRX000199	CRR000211	250	PAIRED	470	ILLUMINA	35.3
RAL_6lines_2	SRX1014304	SRR2006603	CRX000201	CRR000214	250	PAIRED	470	ILLUMINA	34.4
RAL_6lines_3	SRX1020503	SRR2012657	CRX000202	CRR000215	250	PAIRED	470	ILLUMINA	28.9
RAL_6lines_4	SRX1022694	SRR2015521	CRX000203	CRR000216	250	PAIRED	470	ILLUMINA	31.6
RAL_6lines_5	SRX1034909	SRR2040552	CRX000204	CRR000217	250	PAIRED	470	ILLUMINA	34.1
RAL_6lines_6	SRX1037931	SRR2039538	CRX000205	CRR000218	250	PAIRED	470	ILLUMINA	34.2
RAL_437	SRX1038885	SRR2043048	CRX000274	CRR000287	100	PAIRED	5380	ILLUMINA	3.1
33lines_ME-Scan	SRX1846358	SRR3668901	CRX007557	CRR008226	125	PAIRED	500-1000	ILLUMINA	0.44
	SRX1846832	SRR3669570	CRX007558	CRR008235	125	PAIRED	500-1000	ILLUMINA	0.44
	SRX1846859	SRR3669594	CRX007559	CRR008243	125	PAIRED	500-1000	ILLUMINA	0.58
	SRX1846889	SRR3669625	CRX007560	CRR008245	125	PAIRED	500-1000	ILLUMINA	0.33
RAL_208_Testis	SRX1842650	SRR3663888	CRX007553	CRR008182	150	PAIRED	500	ILLUMINA	2.7
RAL_208_Testis	SRX1842775	SRR3664013	CRX007554	CRR008190	150	PAIRED	500	ILLUMINA	4.1
RAL_208_Ovary	SRX1842793	SRR3664030	CRX007555	CRR008199	150	PAIRED	500	ILLUMINA	3
RAL_208_Ovary	SRX1842807	SRR3664123	CRX007556	CRR008207	150	PAIRED	500	ILLUMINA	2.2
RAL_208_Head	SRX1838081	SRR3659025	CRX007551	CRR008095	150	PAIRED	500	ILLUMINA	4.1
RAL_208_Head	SRX1842622	SRR3663861	CRX007552	CRR008167	150	PAIRED	500	ILLUMINA	5.1

## Sheet: S6
Supplemental Table 6. Insertion sites of nine retrocopies and primer information of subsequent PCR experiments.
For paired-end sequencing data, which can determine the exact insertion sites at the base level, we designed primers with one in the flanking region and the other in the internal retroposed locus to validate the existence of the retrocopy and for further Sanger sequencing. For ME-Scan data, which can only determine the ~1000 bp region surrouding the insertion site, we first designed primers in in…
Gene ID	Position	Primers (5'-3')
		Flanking	Internal
CG17604_r	SR:TATAA
	Satellite#	GCTCTAGACCCCCTCCTTACAAAAAATGCGAAAATTGA	GGAATTCGGAAGCAGATAAAAAACAAGCGGCAAACAT
	2L:11489564#	TCCTTGCGTCTACAATGTTAC ACTTTTATTAAAATCAGAACCATCA	TCGCAATGAGATAAATACGTT TTTGTGTAGCTTCTCACTGTTGCTT
	2R:21009193#	CCTTATTTCGCTCGTACTTATT TCGATGCGTACTCAGATGAAATTAC
	3R: 3618946#	GGCGATAGTTTCATTCTTCATTC CCGGATCAGATACCTGTTACTCAGA
	3R:9536417#	ATGATGCGGTTCTTCTTCTCAAGTC TACAATGGCAAGGCGAGAGTTCTA
CG10212_r	LINE:DOC_DM
	2L:13226230#	TGGATTCTTATCTCGCTTACC AAAAGGGAATAGAAAAGTTAAGGAT	TTTGGAAGGAGATGTCGTCGAT GGAGCTAAAGATGCCACTGAAGTTC
	2R:3607631#	CCAGTCGTGCGTGTAATCCATTTTGCAATC	GCAGATAAAAAACAAGCGATCAGCTACGAC
	3R:21723045#	CGGCATAGTTGTTATGAAAAGCATCAGTGG
CG32082_r	3L:230088887#	ATTGATCACGCTCACCACATACATGCCAC TCTCCGTCATATACATAAGCTTCTG	TGGAGAGCTATCAGAAGGCCGTGTCCAC GGAATGATCTCACGAGAAGCGGCAATC
CG4799_CG11924_r	3L:21967546#	CGGGATCCGCGCATTTTATTTCCCAAAATCCAC	GGAATTCCGCATCGATTACGAGAGTACTGTCTACG
CG33957_r	2L:17134768#	AAGAAGTTTACGCATTTCATACTCA AATGTAGTTTATGTGTAGGAGTGGG	CATCGGACTGGCACATCAGACTTGAATA CGCAGGTGATCTATCTCATCGTTC
CG14796_r	X:8740722-8741237x	TCATGCCACGATTTCCTACTTCCGCAATTCG GGCCAAGGTGAAGCGCAAGCGCTGC	GACGGCTCCAAACACAACTAAAGTAG TTGGAGTCGTCGAGGTGATAGGTTTCTC
CG31605_r	3L:17668235x	TTGAACACCTAATCTCCCAACTAAT GCTTAATGATGCCAAGAATAAACT	TTGATAAGCTGGTGCCAAACTATGA CACTCTCCTCCAGTTCGCTCTT
CG5020_r	3R:13789450#	TAACCCTTCACCTCCCCCTTCG TTTGGGCTTTGTCTATCCGCAC
CG1242_r	3L:2624322-2624753x	TTATCACTAGACAAACGCAGACAG CCTCTTTAGGCTTCCCATATATACA	GATCCGCTATGAGTCCCTTAC GAGTAGAAACCCACACCGAACTGAC
	3R:15303121-15303991x	AGTGGCAGTAAACTCTAGAAGCATA ACAGACTTGGCTTGTGATTATAGAA

## Sheet: S7
Supplemental Table 7. Candidate poly(A) tail and TSDs in flanking regions of the 5 D. melanogaster-specific retrocopies and 96 retrogenes predating D. melanogaster and D. simulans species split
"N" means that there is no recognizable signal passing the threshold in the flanking regions (see also Methods). (Bai et al, 2007) identified a total of 97 retrogenes with only CG12324 being species-specific. Since 96 retrogenes are old, nucleotide-level alignment is of poor quality. Thus, we did not make a statistics of their truncation here. As for the five young cases, CG12324 and CR12628are l…
Age	Parental Gene	Retrogene	poly(A)	TSDs
D. melanogaster specific	CG33932	NA	N	N
	CG16728	NA	N	N
	CG2033	CG12324	AAAA	N
	CG1742	CR12628	AAAAAAA	AATCA/AATCA
	CG3265	CG40354	N	ATTCTTCTTG/ATCTTCTTG
Predating D. melanogaster and D. simulans split	CG1740	CG10174	N	N
	CG15645	CG13732	N	GCCTAACT/GCCCAACT
	CG11958	CG9906	N	N
	CG11958	CG1924	GTTAAAA	N
	CG14213	CG9573	N	N
	CG8331	CG4960	N	N
	CG8628	CG8629	N	N
	CG1913	CG2512	N	N
	CG10067	CG18290	N	N
	CG17734	CG11825	N	N
	CG1041	CG5265	N	N
	CG3422	CG17268	N	N
	CG11267	CG9920	N	N
	CG8931	CG5755	N	N
	CG1873	CG8280	N	N
	CG6593	CG5650	N	TAAAAA/TAAAAA
	CG32672	CG12334	N	N
	CG3560	CG17856	N	N
	CG3988	CG6208	N	N
	CG1065	CG6255	N	N
	CG1721	CG17645	N	N
	CG6998	CG5450	N	N
	CG10444	CG32669	N	N
	CG4769	CG14508	N	N
	CG9327	CG1736	N	N
	CG11217	CG4209	N	N
	CG4904	CG5648	N	N
	CG8385	CG7197	N	N
	CG16982	CG16988	N	N
	CG2915	CG4408	N	N
	CG9091	CG9873	N	N
	CG5355	CG2528	N	N
	CG4173	CG2916	N	N
	CG17437	CG10931	N	N
	CG4443	CG9602	N	N
	CG6852	CG7975	N	N
	CG3161	CG32089	N	N
	CG3161	CG32090	N	N
	CG8310	CG8186	N	N
	CG9244	CG4706	N	N
	CG3798	CG9722	N	N
	CG9032	CG31477	N	N
	CG31954	CG9564	N	N
	CG2621	CG31003	N	N
	CG5254	CG9582	N	N
	CG2151	CG11401	N	N
	CG5395	CG4701	N	N
	CG10827	CG5150	N	N
	CG9503	CG9518	N	N
	CG3161	CG9013	N	N
	CG1970	CG11913	N	N
	CG7998	CG10748	N	N
	CG8937	CG4264	N	N
	CG17746	CG12169	N	N
	CG14534	CG8986	N	N
	CG13067	CG13069	N	N
	CG12101	CG2830	N	N
	CG9868	CG31742	N	N
	CG1455	CG9842	N	N
	CG11537	CG5078	N	N
	CG5887	CG7923	N	N
	CG7998	CG10749	N	N
	CG3431	CG1950	N	N
	CG2076	CG1287	N	N
	CG1404	CG7815	N	N
	CG1906	CG6036	N	N
	CG8757	CG9150	N	N
	CG17246	CG5718	N	N
	CG10751	CG10838	N	N
	CG17919	CG6180	N	N
	CG9998	CG3162	N	N
	CG8918	CG32238	N	N
	CG32675	CG32087	N	N
	CG12194	CG8602	N	N
	CG13077	CG13078	N	N
	CG8800	CG10839	N	N
	CG10638	CG9436	N	N
	CG2028	CG7094	N	N
	CG5178	CG5409	N	N
	CG1907	CG18418	N	N
	CG12157	CG8330	N	N
	CG1907	CG7514	N	N
	CG4254	CG6873	N	N
	CG32684	CG31202	N	N
	CG1548	CG10104	N	N
	CG12736	CG6050	N	N
	CG5304	CG9254	N	N
	CG3967	CG17003	N	N
	CG2028	CG2577	N	N
	CG9916	CG7768	N	N
	CG31715	CG7423	N	N
	CG1743	CG2718	N	N
	CG4386	CG18735	N	N
	CG10472	CG7542	N	N
	CG5268	CG1409	N	N
	CG5659	CG12362	N	N

## Sheet: S8
Supplemental Table 8. Recently originated retrocopies in mosquito, zebrafish, chicken, mouse and human.
This table was created by following the column convention in Table 3 of the main text. For some of the retrocopies the LTR retrotransposons were found on only one side (the sequence possibly having degenerated on the other side), thus only one microsimilarity stretch was inferred. “-” in the column “Retrocopy” means that the retrocopies are not annotated as a gene model in the current assemblies …
Species	Parental gene	Chr	Retrocopy	Retro_location		Divergence	Microsimilarity	Flanking transposon, transposon family, divergence	Orientation	poly(A)	TSD	5' truncation	3' truncation	Mechanism	Host gene	Host protein length (aa)
mosquito	AGAP012621	UNKN	AGAP012622	ChrU:36337128-36337804	intergenic	0.008	-	no	-		TTATTTAGTTA/TTATTTCGTCA	20	36	non-LTR
	AGAP006895	2L	AGAP009948	3R:46704328-46704973	intronic	0.035	-	no	+	GGCAATAAACAAACAAAACACGCAAAAAAAAAAAAAAAA		21	1	non-LTR
	AGAP000264	X	ENSANGG00000011308	ChrU:13581875-13582553	intergenic	0.061	5, 7	BEL18-I_AG, LTR, 36.3%	-			44	984	LTR
	AGAP000812	X	AGAP011060	3L:14861903-14862876	intergenic	0.089	-	no	+			27	227	Uncertain
zebrafish	ENSDARG00000018006	17	ENSDARG00000091657	1:15201859-15203385	intergenic	0.009	-	no	-	TTTTTTTTTTTTTTTT	TATAT/TATAT	15	0	non-LTR
	ENSDARG00000070723	25	ENSDARG00000094312	10:7156934-7157650	intronic	0.018	-	no	-		CATAG/CATAG	297	683	Uncertain	ENSDARG00000053443	198
	ENSDARG00000002400	4	-	14:8353740-8354047	intronic	0.019	14, 3	ERVN1-LTR_DR, LTR, 2.6%	-		GGTTCTCCG/GCTCCTTCCG	205	900	LTR	ENSDARG00000086585	599
	ENSDARG00000011934	2	-	13:14578697-14579272	intergenic	0.02	-	no LTR, but inserted into a LINE element	-			514	1534	Uncertain
	ENSDARG00000026369	9	-	2:43698071-43698500	intronic	0.049	-	no	+		ATAAAG/ATAAG	253	785	Uncertain	ENSDARG00000053232	793
	ENSDARG00000053058	3	ENSDARG00000093606	8:27555627-27556162	intronic	0.059	-	no	-	TTTTT	CATATACGCTTGTTAGG/CTATCCGCTTGTTAAG	46	23	non-LTR	ENSDARG00000068575	253
	ENSDARG00000032849	19	-	7:14080392-14080646	intronic	0.074	7, 4	Gypsy164-LTR_DR, LTR, 6.1%	-			444	1645	LTR	ENSDARG00000078060	488
	ENSDARG00000023290	19	ENSDARG00000096377	3:35032704-35033635	intronic	0.076	-	no	-		CCATGACATGTCAAGATTTTATCACGACAAAATTGCATAA/CCATGACATGTCAAGATTTTATCAAGACAAAATTGCATAA	278	45	Uncertain	ENSDARG00000009568	326
	ENSDARG00000011511	6	-	16:10339626-10340301	intergenic	0.079	8, -2	Gypsy-115-I_DR, LTR, 13.3%; Gypsy97-I_DR, LTR, 22.3%	-			37	765	LTR
	ENSDARG00000076317	23	-	19:16433208-16433384	intergenic	0.084	4, -71	DIRS1_DR, LTR, 20.7%; ERV4_DR, LTR 4.3%	+			92	2267	LTR
	ENSDARG00000032373	21	ENSDARG00000091935	13:20685622-20686365	intergenic	0.088	4	Gypsy35-LTR_DR, LTR, 10.8%; 5'	-			0	3073	LTR
	ENSDARG00000006413	12	-	16:52660215-52660471	intergenic	0.089	-	no	+	AAAAATAAAAATAGTAAAAATAATAACAAAA		29	546	Uncertain
	ENSDARG00000037350	1	-	10:26583363-26584007	intronic	0.097	-	no	-			31	229	Uncertain	ENSDARG00000043857	90
chicken	ENSGALG00000011438	4	-	2:86985849-86986164	intergenic	0	-	no	+			1170	2324	Uncertain
	ENSGALG00000016460	3	-	2:16967735-16968142	intronic	0.019	-	no	+			288	6910	Uncertain	ENSGALG00000007766	1913
	ENSGALG00000011869	4	-	1:93977485-93977747	intergenic	0.034	-	no	-			219	14775	Uncertain
	ENSGALG00000011311	8	-	Z:30303186-30304176	intergenic	0.037	-	no	+			0	2147	Uncertain
	ENSGALG00000006009	12	-	2:72291271-72292468	intergenic	0.041	-18	GGLTR3F2, LTR, 6.0%; 5'	-			0	728	LTR
	ENSGALG00000000312	24	-	5:3521166-3521540	intergenic	0.042	1, 1	GGERVL18, LTR, 10.4%	-			1643	492	LTR
	ENSGALG00000016555	3	-	1:79385169-79385497	intergenic	0.045	-	no	-			1290	357	Uncertain
	ENSGALG00000011896	24	-	1:181635935-181637373	intergenic	0.048	-20	GGLTR3F2, LTR, 3.8%; 5'	+	AGAAA		1268	802	LTR
	ENSGALG00000014442	1	-	1:151139877-151140078	intergenic	0.049	-6	CR1-F2, LINE, 11.2%; 5'	+			708	295	non-LTR
	ENSGALG00000003947	6	-	3:11665915-11666978	intronic	0.054	-	no	-			66	0	Uncertain	ENSGALG00000009158	1718
	ENSGALG00000010313	8	-	12:280689-281481	intergenic	0.054	12	CR1-F2, LINE, 2.6%; 5'	-			1559	8204	non-LTR
	ENSGALG00000003920	4	-	Z:71844688-71846561	intergenic	0.054	6	CR1-F, LINE, 5.0%; 5'	-			1054	971	non-LTR
	ENSGALG00000014647	25	-	2:54837315-54837481	intronic	0.059	-	no	+			199	2692	Uncertain	ENSGALG00000012433	1142
	ENSGALG00000005846	Z	-	1:126706523-126706818	intergenic	0.06	-	no	+			5753	583	Uncertain
	ENSGALG00000012836	10	-	6:31492481-31492739	intergenic	0.069	-3	CR1-F2, LINE, 6.3%; 5'	+			572	19	non-LTR
	ENSGALG00000004039	21	-	8:8780967-8781214	intergenic	0.072	-	no	+			66	247	Uncertain
	ENSGALG00000001041	11	-	5:5681400-5682321	intergenic	0.076	0, 7	GGLTR11, LTR, 9.2%	+			541	1066	LTR
	ENSGALG00000006865	6	-	Z:45929254-45929857	intergenic	0.084	-2, -3	CR1-C3, LINE, 19.5%	-			333	2898	non-LTR
	ENSGALG00000025882	24	-	5:31717538-31718018	intronic	0.084	-	no	+			188	262	Uncertain	ENSGALG00000009847	210
	ENSGALG00000021601	28	-	5:39988376-39988798	intronic	0.089	-75	CR1-H, LINE, 8.2%; 5'	+			50	2259	non-LTR	ENSGALG00000010562	340
	ENSGALG00000007046	24	-	5:31717317-31718018	intronic	0.097	-	no	+		TAATTTG/TAACTG	868	457	Uncertain	ENSGALG00000009847	210
mouse	ENSMUSG00000036943, ENSMUSG00000048626, ENSMUSG00000028559, ENSMUSG00000020740	9,4,4,11	Super	3:68704088-68708075	intronic	0.0012	3, -5, 11, -19, -23, -31, -5, -4	MERVL, LTR, 2.3%	-			141, 268, 0, 1374	1551, 1814, 1970, 1874	LTR	ENSMUSG00000027778	777
	ENSMUSG00000024866	19	-	14:76241293-76241518	intergenic	0.004	10, 4	MT, LTR, 1.6%	+			1037	242	LTR
	ENSMUSG00000048154	15	retro-Kmt2d	12:84846033-84846486	intergenic	0.008	-6, 3	MERVL, LTR, 0.9%; MT, LTR, 3.2%	+			4711	14639	LTR
	ENSMUSG00000024077	17	ENSMUSG00000084064	11:27782978-27783366	intergenic	0.018	-77, 7	MERVL, LTR, 1.0%	+			4	2571	LTR
	ENSMUSG00000032412	9	ENSMUSG00000083892	X:20723829-20724766	intergenic	0.031	-26, 7	RLTR10, LTR, 4.5%	+			0	875	LTR
	ENSMUSG00000021752	14	ENSMUSG00000083549	4:70733630-70734178	intergenic	0.05	-2, 10	IAPEy, LTR, 13.2%	+			161	936	LTR
	ENSMUSG00000067274	5	retro-Rplp0	5:84292187-84292848	intergenic	0.078	1, -83	ORR1A3, LTR, 11.7%	+			466	214	LTR
	ENSMUSG00000071644	19	retro-Eef1g	6:95200241-95204521	intergenic	0.097	-17, -4	RLTR12B, LTR, 16.2%; ORR1D2, LTR, 23.2%	+			118	368	LTR
human	ENSG00000137414	6	ENSG00000218772	6:134924279-134925855	intronic	0.079	12, -17	HERVK14, LTR, 9.4%	-			36	66	LTR	ENSG00000232310	lincRNA
	ENSG00000137414	6	ENSG00000254722	11:56098382-56100015	intergenic	0.087	12, 8	HERVK14, LTR, 7.0%	-			11	66	LTR
	ENSG00000176788	5	ENSG00000230535	13:23471168-23472296	intronic	0.093	0, -44	MER4, LTR, 16.2%	-			108	642	LTR	ENSG00000262619	lincRNA

## Sheet: S9
Supplemental Table 9. Primer sequences used in the RT-PCR and qRT-PCR experiments depicted in Fig. 2, and expected band sizes.
We initially chose a random line for RT-PCR experiments that encoded the retrocopy of interest. Later, to make the dissection work of qRT-PCR easier, we chose lines encoding as more retrocopies as possible. So, we may use different lines (e.g., line 399 for RT-PCR and line 820 for qRT-PCR in CG32082_r) to perform two rounds of PCR experiments. The primer pairs used for qRT-PCR experiments are mar…
Gene ID	Line	Note	Primer (5'-3')	Length (bp)
CG17604_r	208/208	5'	TTTTCTTGACCTGGAAGCAG	136
			AGCTTTGTTGGCCTCTATTG
		3'	GCTAAAAGATTCCAAAGGGC1	138
			AGCCTTCAGCCTTACTCCAT1
CG32082_r	399/820	3'	TGGATACAGTACCAGCAAC1	122
			CAACCAGATCACCTGCTT1
CG5119_CR42443_r	380/852	5'	TCACATCAAAGACCACATGC1	237
			CAGCCTCTGTTGTCTCGAAT1
		Chimeric	TCTGTATCCGATGATTGAGC	150
			GCGTAAATTTAAACAGCCTCC
CG33957_r	208/208	5'	TCCACGATTCTAAATTCAGTTGC	141
			CCCGCTCATGTTGAAGCTC
		3'	AAGCCGTGGCTAACTTAACA1	144
			ATGGACCTAAATACCCGCTT1
CG14796_r	208/208	5'	CGGACTCCTATTGTGAAAGG1	118
			TTAGTTGTGTTTGGAGCCGT1
		3'	CCCACAAGAACTCCAACAAG	136
			AAGGAACAGGGTTTTGAAGC
CG5020_r	437/437	5'	TTTTCTTGACCTGGAAGCAG1	141
			GGTAGATCGGGCGGTAGTAT1
		3'	CAAATGGCAGCCTAGAAGAG	144
			GTCTGCATTTTCGGCTATGT
CG3631_r	335/335	5'	AATTTGTTGGATTGTTTGCCTA	121
			CATCGGCTAACAACTGTTCG
		3'	GGCGACAAAATGTTCAAAAC1	136
			AAGGAAGACACTGGAAGGCT1
CG2662_r	303/820	5'	TTCTAAAAGTTTTCTCAGGCTA	139
			GGATTGTTTCATAGTCACCG
		3'	ACTCTCTCTCTTCAGTCCCG1	180
			TTGAGCTGACAGAACCATTT1
CG31605_r	859/852	5'	CATGGTCACTTAAGCCTGT1	164
			GATTTGTGAATTTACTCCGTT1
CG4799_CG11924_r	208/208	5'	GCACAGATATACCAGCAGGC	142
			TGAATGTGTCGGTGAAACTG
		3'	GGGATGAGCAAACCAATAAA1	141
			GAGAACCCAACGCATTAGAA1
		Chimeric	CAAAAGGGCAAAGGTACAAA	131
			GAGATCCTGATCCTGCTGGT
BLASTOPIA (CG17604_r)	208	3'	GGGTCAAAGACAATGGCA1	197
			GTTGTTGCCAGCCTTCAG1
BLASTOPIA (CG32082_r)	820	3'	GGGTCAAAGACAATGGCA1	197
			GTTGTTGCCAGCCTTCAG1
STALKER2 (CG5119_CR42443_r)	852	5'	TCTAATAATATGCGTGCTCT1	170
			GTAACGCATAATTACTGTCC1
BLASTOPIA (CG33957_r)	208	3'	GGGTCAAAGACAATGGCA1	197
			GTTGTTGCCAGCCTTCAG1
MAX (CG14796_r)	208	5'	TTCTGGGAGGTGGAGGAT1	180
			AGCTAGCGCAATGGACCT1
BLASTOPIA (CG5020_r)	437	5'	GGGTCAAAGACAATGGCA1	197
			GTTGTTGCCAGCCTTCAG1
Gypsy5 (CG3631_r)	335	3'	GATAAAACTCCGTATGGTCA1	102
			CCAGTTTAAGCCTATGCC1
412 (CG2662_r)	820	3'	TTGAGCTGACAGAACCATTT1	186
			CTTTGTTTTCACCAGCTTTG1
TABOR (CG31605_r)	852	5'	TATTTTCCAAAAGGAGGGAG1	194
			ACTCTGCACTTCTGGTCTGA1
BATUMI (CG4799_CG11924_r)	208	5'	AACGTAAGAGGGAGCGGA1	151
			TCGCTCAAAAGACCGTGT1

## Sheet: S10
Supplemental Table 10. Copy number of full-length LTR retrotransposons in fruitfly.
UCSC RepeatMasker track of dm3 assembly was downloaded. Full-length retrotransposons were identified with "repStart=1 and repLeft=0" where the candidate element matches the concensus sequence from the start to the end.
LTR	Number
BLASTOPIA	14
BATUMI	4
STALKER2	3
MAX	4
TABOR	4
412	27
Gypsy5	1

[truncated: 6 more sheets: S11, S12, S13, S14, S15, S16]
